# Supplementary material
Source: Springer Nature journal article supplement (https://www.springermedizin.de/resource/supplementary/13058_2004_961_MOESM6_ESM.pdf/9705738)

**(a)**

070902.003

↑  
CD8<sup>+</sup>

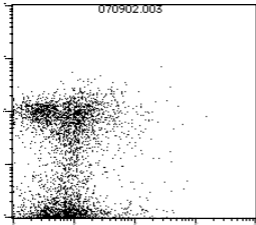**(b)**

070902.005

IFN- $\gamma$  →

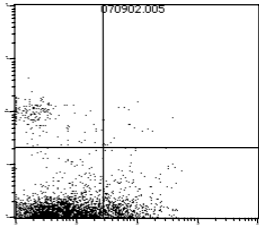

Supplement: MOESM6 [file 9705738]
